# Supplementary material for: Northern Hemisphere atmospheric pattern enhancing Eastern Mediterranean Transient-type events during the past 1000 years
Source: Copernicus journal article supplement (doi:10.5194/cp-17-1523-2021), 2021-07-20
Supplement: Supplementary file 1 [file Sup_material.xlsx]

## Sheet: Hoja1
Eastern (E)										Western (W)
Versteegh et al., 2007			Gogou et al., 2016			Grauel et al., 2013				Nieto-Moreno et al., 2013						Moreno et al., 2012			Sicre et al., 2016
Age (yr A.D.)	SST	std SST	Age (yr A.D.)	SST	std SST	Age (yr A.D.)	SST	std SST		Age (yr A.D.)	SST	std SST	Age (yr A.D.)	SST	std SST	Age (yr A.D.)	SST	std SST	Age (yr A.D.)	SST	std SST
1975.13	16.5	0.678355	2010	20.4	2.78036	2005.1	16.745	0.275337		2005	19.45	0.361352	1999.07	18.79	-0.870745	1988	13.4	-1.93493	2012.2	17.2	0.692791
1971.26	16.53	0.716051	2003	19.2	1.0301	2003.2	17.1886	0.837189		1998	19.86	1.26939	1993.12	19.38	1.00285	1972	13.5	-1.78734	2010.1	17.9	1.65029
1967.39	15.84	-0.150959	1995	19.1	0.884245	2001	15.6542	-1.1062		1992	19.2	-0.192333	1987.17	19.61	1.73323	1970	13.5	-1.78734	2007.9	18.4	2.33421
1963.52	16.23	0.33909	1988	19.4	1.32181	1998.8	14.6647	-2.35954		1985	18.96	-0.72387	1975.26	18.88	-0.584943	1952	13.8	-1.34457	2005.6	18.7	2.74457
1959.65	15.76	-0.251482	1980	19.8	1.90523	1996.5	15.3729	-1.46255		1979	20.33	2.31032	1963.36	18.74	-1.02952	1944	13.9	-1.19698	2003.2	18.4	2.33421
1955.78	17.85	2.37468	1973	20	2.19694	1994.2	15.0825	-1.8304		1973	18.97	-0.701722	1957.4	19.25	0.590024	1933	14.1	-0.901804	2000.8	17.8	1.5135
1951.91	18.32	2.96525	1965	20.2	2.48865	1991.8	14.8597	-2.11253		1966	19.54	0.560679	1951.45	18.98	-0.267384	1915	14.4	-0.459037	1998.4	18.5	2.471
1948.04	17.22	1.58306	1958	19.5	1.46766	1989.3	16.0734	-0.57531		1960	18.95	-0.746017	1919.19	19.2	0.431244	1915	13.8	-1.34457	1995.8	18.1	1.92386
1944.17	17.04	1.35688	1951	19	0.73839	1986.8	15.9633	-0.714674		1953	20.37	2.39891	1886.94	19.4	1.06636	1887	14.1	-0.901804	1993	18.8	2.88135
1940.3	15.76	-0.251482	1943	19	0.73839	1984.3	15.3622	-1.47606		1947	19.79	1.11436	1854.68	18.84	-0.711966	1887	13.8	-1.34457	1990.3	18.7	2.74457
1936.43	16.47	0.640659	1936	18.9	0.592535	1981.8	15.4512	-1.3633		1880	20.16	1.93382	1822.42	19.06	-0.0133375	1859	13.9	-1.19698	1987.4	18.5	2.471
1932.56	16.47	0.640659	1928	18.4	-0.136739	1979.2	15.8031	-0.917618		1847	19.26	-0.0594482	1790.16	19.48	1.32041	1859	14.2	-0.754215	1984.7	18.5	2.471
1928.69	16.02	0.0752176	1921	18.6	0.154971	1976.6	16.1841	-0.435015		1813	19.73	0.981479	1757.9	18.7	-1.15655	1831	14.2	-0.754215	1981.8	19	3.15492
1924.82	15.93	-0.0378706	1913	18.6	0.154971	1971.4	18.0097	1.87719		1780	19.14	-0.325217	1725.65	18.52	-1.72815	1831	13.9	-1.19698	1978.8	18.2	2.06064
1920.95	16.05	0.112914	1906	18.3	-0.282594	1968.7	17.6058	1.36562		1747	19.29	0.00699391	1693.39	18.92	-0.457919	1802	14	-1.04939	1975.7	18.1	1.92386
1917.08	16.26	0.376786	1899	18.7	0.300825	1966	17.6441	1.41415		1713	18.66	-1.38829	1661.13	18.71	-1.12479	1786	14.5	-0.311448	1972.7	17.8	1.5135
1913.21	16.65	0.866835	1891	18.5	0.00911592	1963.3	17.6278	1.39358		1680	19.13	-0.347364	1628.87	19.17	0.335977	1774	14.2	-0.754215	1966.5	19.1	3.29171
1909.34	15.64	-0.402266	1884	18.9	0.592535	1960.6	17.0547	0.667654		1647	18.85	-0.967491	1596.61	18.97	-0.29914	1746	13.9	-1.19698	1963.4	18.5	2.471
1905.47	15.67	-0.36457	1876	18.5	0.00911592	1957.9	16.2676	-0.329332		1613	18.76	-1.16682	1564.36	18.79	-0.870745	1742	14.8	0.131319	1960.4	17.9	1.65029
1901.6	15.64	-0.402266	1869	19	0.73839	1955.1	16.1104	-0.528393		1580	19.71	0.937184	1532.1	18.87	-0.616699	1718	14	-1.04939	1971.2	17.8	1.5135
1897.73	16.68	0.904531	1861	18.4	-0.136739	1952.3	15.4891	-1.3153		1547	18.62	-1.47688	1499.84	18.77	-0.934257	1697	15	0.426497	1965	17.6	1.23993
1893.86	16.41	0.565267	1854	18.8	0.44668	1949.5	16.9237	0.501763		1513	19.22	-0.148038	1467.58	19.22	0.494756	1689	14.1	-0.901804	1958.8	17.3	0.829576
1889.99	15.73	-0.289178	1847	18.3	-0.282594	1946.7	14.6509	-2.37702		1480	18.79	-1.10038	1435.32	18.73	-1.06128	1661	14.2	-0.754215	1952.6	18	1.78707
1886.12	15.61	-0.439962	1839	18	-0.720158	1943.9	17.3529	1.04541		1447	18.94	-0.768165	1403.07	19.16	0.304221	1653	15	0.426497	1946.4	17.4	0.966361
1882.25	16.89	1.1684	1832	16.6	-2.76212	1941.1	15.8159	-0.901371		1413	19.12	-0.369512	1370.81	18.7	-1.15655	1633	13.9	-1.19698	1940.2	17.3	0.829576
1878.38	16.83	1.09301	1824	18.4	-0.136739	1938.2	15.6711	-1.08488		1380	19.33	0.0955834	1338.55	18.8	-0.83899	1609	15.3	0.869264	1934	16.7	0.0088657
1874.51	15.28	-0.854619	1817	18	-0.720158	1935.4	17.1812	0.827844		1347	19.01	-0.613133	1306.29	18.65	-1.31533	1605	14.1	-0.901804	1927.8	16.8	0.145651
1870.64	15.99	0.0375216	1809	17.9	-0.866013	1932.5	16.1158	-0.521521		1313	18.87	-0.923196	1274.03	19.24	0.558268	1576	14.2	-0.754215	1921.5	16.8	0.145651
1866.77	15.55	-0.515354	1802	18.4	-0.136739	1929.6	15.9808	-0.692498		1280	19.29	0.00699391	1241.77	19.1	0.113686	1564	15.2	0.721675	1908.6	17.4	0.966361
1862.9	16.11	0.188306	1795	18.5	0.00911592	1926.7	16.2651	-0.332425		1247	18.89	-0.878901	1209.52	18.82	-0.775478	1548	14.2	-0.754215	1898.7	16.6	-0.127919
1859.03	15.22	-0.930011	1787	18.6	0.154971	1923.8	14.6017	-2.43932		1213	19.32	0.0734361	1177.26	18.97	-0.29914	1520	15.1	0.574086	1888.8	17.1	0.556006
1855.16	14.98	-1.23158	1780	18.1	-0.574303	1920.8	16.0933	-0.550125		1180	19.29	0.00699391	1145	19.12	0.177198	1520	14.4	-0.459037	1878.8	16.5	-0.264704
1851.29	15.29	-0.842054	1772	17.9	-0.866013	1917.9	14.9846	-1.95441		1147	18.89	-0.878901	1112.74	18.95	-0.362652	1508	15	0.426497	1868.9	16.7	0.0088657
1847.42	15.31	-0.816923	1765	17.7	-1.15772	1914.9	15.3073	-1.54561		1113	19.11	-0.391659	1080.48	19.3	0.748803	1508	14.6	-0.163859	1859	16.3	-0.538274
1843.55	15.52	-0.55305	1757	18.1	-0.574303	1912	15.9061	-0.787218		1080	19.36	0.162026	1048.23	19.73	2.1143	1497	15	0.426497	1849	16.2	-0.675059
1839.68	14.86	-1.38236	1750	17.7	-1.15772	1909	16.2036	-0.410399		1047	19.82	1.18081	1015.97	19.14	0.240709	1497	14.2	-0.754215	1826.9	16.1	-0.811844
1835.81	16.26	0.376786	1739	17.9	-0.866013	1906	16.6779	0.19035		1013	18.99	-0.657428	983.71	19.46	1.2569	1485	14.2	-0.754215	1814.5	16.1	-0.811844
1831.94	14.99	-1.21901	1728	17.7	-1.15772	1903	16.334	-0.245209		980	19.93	1.42443	951.45	18.74	-1.02952	1485	14.3	-0.606626	1802.2	17.3	0.829576
1828.07	15.87	-0.113263	1717	17.3	-1.74114	1900	16.4615	-0.08372					919.19	19.63	1.79675	1473	13.8	-1.34457	1789.8	16.9	0.282436
1824.2	15.74	-0.276612	1706	17.6	-1.30358	1896.9	17.6264	1.39178					886.94	19.24	0.558268	1462	13.8	-1.34457	1777.4	16.4	-0.401489
1820.33	15.9	-0.0755667	1694	17.4	-1.59529	1893.9	16.3088	-0.277146					854.68	19.43	1.16163	1450	13.7	-1.49216	1765	16	-0.94863
1816.46	15.56	-0.502789	1683	17.9	-0.866013	1890.8	16.1707	-0.452047					822.42	19.25	0.590024	1435	13.6	-1.63975	1752.6	16	-0.94863
1812.59	15.96	-0.000174519	1672	18	-0.720158	1887.8	16.0048	-0.662131					790.16	19.08	0.0501742	1420	13.5	-1.78734	1740.3	16.2	-0.675059
1808.72	16.52	0.703486	1661	18.2	-0.428448	1884.7	16.2133	-0.398095					757.9	18.65	-1.31533	1415	14.9	0.278908	1727.9	16.1	-0.811844
1804.85	15.74	-0.276612	1650	17.9	-0.866013	1881.6	16.9016	0.4737					725.65	19.18	0.367733	1405	13.6	-1.63975	1715.5	16.5	-0.264704
1800.98	16.25	0.364221	1639	17.8	-1.01187	1878.5	16.1827	-0.436775					693.39	18.89	-0.553187	1390	13.7	-1.49216	1708.8	17.1	0.556006
1797.11	16.29	0.414482	1628	19.7	1.75937	1875.4	16.6019	0.0941458					661.13	20	2.97171	1375	13.8	-1.34457	1702	17	0.419221
1793.24	16.53	0.716051	1617	18.9	0.592535	1872.3	16.5301	0.0031819					628.87	19.1	0.113686	1360	13.8	-1.34457	1695.3	17.1	0.556006
1789.37	17.85	2.37468	1606	20	2.19694	1869.2	16.215	-0.395883					596.61	18.86	-0.648455	1345	14.7	-0.0162697	1688.5	17.2	0.692791
1785.5	17.4	1.80924	1595	20.6	3.07207	1866	16.2837	-0.308949					564.36	19.04	-0.0768492	1345	14.1	-0.901804	1681.8	17.5	1.10315
1781.63	16.8	1.05532	1584	18.7	0.300825	1862.9	16.8148	0.36378								1330	14.4	-0.459037	1675.1	18	1.78707
1777.76	16.47	0.640659	1573	18.9	0.592535	1859.7	16.294	-0.295879								1320	14.7	-0.0162697	1668.3	16.3	-0.538274
1773.89	17.37	1.77154	1562	18.5	0.00911592	1856.5	16.3804	-0.186375								1315	13.2	-2.2301	1661.6	16.4	-0.401489
1770.02	16.02	0.0752176	1552	18.5	0.00911592	1853.4	16.2418	-0.361974								1300	13.6	-1.63975	1654.8	16.2	-0.675059
1766.15	16.17	0.263698	1541	18.4	-0.136739	1850.2	15.9488	-0.733069								1295	14.7	-0.0162697	1648.1	15.8	-1.2222
1762.28	16.29	0.414482	1530	18.5	0.00911592	1847	16.2501	-0.351442								1285	14.1	-0.901804	1641.3	16.6	-0.127919
1758.41	15.25	-0.892315	1520	18.3	-0.282594	1843.7	17.3441	1.03416								1270	15.3	0.869264	1634.6	15.8	-1.2222
1754.54	15.96	-0.000174519	1509	18.2	-0.428448	1840.5	16.1635	-0.461141								1270	14.5	-0.311448	1627.9	16.2	-0.675059
1750.67	15.76	-0.251482	1498	19	0.73839	1837.3	16.6968	0.214362								1255	14.5	-0.311448	1621.1	16.3	-0.538274
1746.8	14.77	-1.49545	1488	18.8	0.44668	1834	16.4944	-0.0420174								1240	14.5	-0.311448	1614.4	16.4	-0.401489
1742.93	15.67	-0.36457	1477	18.9	0.592535	1830.8	17.0957	0.719537								1237	15.2	0.721675	1601.4	16.4	-0.401489
1739.06	15.07	-1.11849	1466	18.5	0.00911592	1827.5	16.5475	0.0252465								1212	14.8	0.131319	1582.1	16.8	0.145651
1735.19	15.49	-0.590746	1456	19.1	0.884245	1824.3	17.3842	1.08503								1204	15.2	0.721675	1562.8	16.3	-0.538274
1731.32	15.84	-0.150959	1445	18.6	0.154971	1814.4	15.3727	-1.46284								1184	14.9	0.278908	1543.6	17.4	0.966361
1727.45	15.46	-0.628443	1422	19.3	1.17595	1811.1	17.082	0.702165								1171	15.4	1.01685	1524.3	17.7	1.37672
1723.58	14.5	-1.83472	1398	18.2	-0.428448	1807.7	17.9765	1.83524								1156	14.6	-0.163859	1505	16	-0.94863
1719.71	14.98	-1.23158	1375	19.5	1.46766	1804.4	17.3913	1.094								1139	15.5	1.16444	1485.7	16.5	-0.264704
1715.84	15.37	-0.741531	1352	18.3	-0.282594	1791	17.2048	0.857722								1129	14.7	-0.0162697	1466.5	17	0.419221
1711.97	15.01	-1.19388	1329	19	0.73839	1787.6	17.9256	1.77075								1106	14.8	0.131319	1447.2	16.7	0.0088657
1708.1	14.78	-1.48289	1305	18.7	0.300825	1784.2	18.2441	2.17418								1101	14.6	-0.163859	1427.9	16.2	-0.675059
1704.23	14.8	-1.45776	1282	18.6	0.154971	1780.8	18.1617	2.06973								1073	16	1.90239	1408.6	16.8	0.145651
1700.36	14.33	-2.04833	1259	18.6	0.154971	1777.4	18.2318	2.15855								1073	14.4	-0.459037	1391.1	16.7	0.0088657
			1235	18.2	-0.428448	1774	18.3053	2.25169								1045	15	0.426497	1375.3	17	0.419221
			1212	18.5	0.00911592	1770.6	16.1703	-0.452523								1017	14.6	-0.163859	1359.5	17.4	0.966361
			1189	18.4	-0.136739	1767.1	16.9941	0.590886								1011	14.3	-0.606626	1343.6	16.5	-0.264704
			1165	18.1	-0.574303	1763.7	17.6236	1.38824								989	15	0.426497	1327.8	16.9	0.282436
			1142	18.6	0.154971	1760.2	17.1333	0.767146								961	15.3	0.869264	1312	16.4	-0.401489
			1119	17.8	-1.01187	1756.7	17.8746	1.70608								948	15.7	1.45962	1296.2	16.2	-0.675059
			1096	18.3	-0.282594	1753.3	16.9523	0.537911								934	14.2	-0.754215	1280.4	16.7	0.0088657
			1072	17.9	-0.866013	1749.8	17.1764	0.821776								906	15.3	0.869264	1264.6	16.5	-0.264704
			1049	18.5	0.00911592	1746.3	16.7549	0.287968								886	14.7	-0.0162697	1248.8	17	0.419221
			1026	18.2	-0.428448	1742.8	16.0385	-0.619535								878	14.5	-0.311448	1232.9	15.9	-1.08541
			1002	18.6	0.154971	1739.3	16.982	0.575618								850	14.6	-0.163859	1217.1	16.7	0.0088657
			979	18.5	0.00911592	1735.7	16.8236	0.374954								824	14.7	-0.0162697	1201.3	17.2	0.692791
			956	18.5	0.00911592	1732.2	16.2998	-0.288507								807	14.8	0.131319	1185.5	16.8	0.145651
			933	18.7	0.300825	1728.7	16.2446	-0.358427								764	14.9	0.278908	1169.7	17.6	1.23993
			894	17.9	-0.866013	1725.1	16.3204	-0.262466								761	14.9	0.278908	1153.9	16.6	-0.127919
			856	17.8	-1.01187	1721.5	16.6786	0.191304								721	14.4	-0.459037	1138	16.9	0.282436
			817	17.5	-1.44943	1718	15.372	-1.46363								699	15.1	0.574086	1122.2	18	1.78707
			779	18	-0.720158	1714.4	16.4426	-0.107625								679	15.4	1.01685	1106.4	16.8	0.145651
			740	17.6	-1.30358	1710.8	15.978	-0.696093								637	14.9	0.278908	1096.7	16.7	0.0088657
			702	17.9	-0.866013	1707.2	16.2282	-0.379186								636	15.1	0.574086	1093.2	16.2	-0.675059
			663	17.3	-1.74114	1703.6	16.2769	-0.317569								593	15.7	1.45962	1089.6	16.7	0.0088657
			625	18.7	0.300825	1699.9	16.0725	-0.576437								575	14.8	0.131319	1086.1	17	0.419221
			586	18.1	-0.574303	1696.3	16.2552	-0.345053								550	15	0.426497	1082.5	16.7	0.0088657
			548	18.4	-0.136739	1692.7	16.9011	0.473059								517	15.8	1.60721	1078.9	17.1	0.556006
						1689	15.9188	-0.77104								512	15.5	1.16444	1075.4	16.5	-0.264704
						1685.4	15.7087	-1.03714								483	15.6	1.31203	1071.8	16.8	0.145651
						1681.7	15.5233	-1.27204								450	16.2	2.19757	1068.3	17.1	0.556006
						1678	17.1952	0.845649								450	15.3	0.869264	1064.7	17.5	1.10315
						1674.3	15.7386	-0.999267								428	15.7	1.45962	1061.2	16.9	0.282436
						1670.6	16.3226	-0.259655								417	15.6	1.31203	1057.6	17.3	0.829576
						1666.9	15.5459	-1.2434								406	14.8	0.131319	1054	16.7	0.0088657
						1663.2	15.9591	-0.720088								383	15	0.426497	1050.5	17.3	0.829576
						1659.5	15.9031	-0.79103								383	15.6	1.31203	1046.9	17	0.419221
						1655.7	15.5368	-1.25493								361	15.1	0.574086	1043.4	16.9	0.282436
						1652	15.7909	-0.933075								350	15.6	1.31203	1039.8	16.7	0.0088657
						1648.2	15.5454	-1.24399								339	15.3	0.869264	1036.3	16.6	-0.127919
						1644.5	16.3776	-0.189912								317	15.6	1.31203	1032.7	16.5	-0.264704
						1640.7	16.2923	-0.29804								317	15.6	1.31203	1029.1	16.6	-0.127919
						1636.9	15.9509	-0.730435								294	15.8	1.60721	1025.6	16.2	-0.675059
						1633.1	16.4117	-0.146813								272	15.6	1.31203	1022	16.5	-0.264704
						1629.3	16.2399	-0.364324								250	15.5	1.16444	1018.5	16.6	-0.127919
						1625.5	16.1364	-0.495428								228	14.6	-0.163859	1014.9	16.2	-0.675059
						1617.8	16.0417	-0.615436								206	15.9	1.7548	1011.4	16.8	0.145651
						1613.9	17.3129	0.994708								183	15.7	1.45962	1007.8	16.8	0.145651
						1610.1	15.8419	-0.868515								161	15.4	1.01685	1004.2	16.7	0.0088657
						1606.2	16.4803	-0.0599145								139	15.4	1.01685	1000.7	17.2	0.692791
						1602.3	16.406	-0.153955								117	15.5	1.16444	997.1	16.6	-0.127919
						1598.5	16.1081	-0.531321								94	15.1	0.574086	993.6	16.7	0.0088657
						1594.6	16.9266	0.505377								72	15.5	1.16444	990	16.4	-0.401489
						1590.6	15.9963	-0.672954								50	14.8	0.131319	986.5	15.8	-1.2222
						1586.7	16.4238	-0.131506								28	14.7	-0.0162697	982.9	16.3	-0.538274
						1582.8	16.6125	0.107571								6	15.4	1.01685	979.3	16.1	-0.811844
						1578.9	16.6544	0.160616								-17	15.3	0.869264	975.8	16.5	-0.264704
						1574.9	16.4837	-0.0555264								-39	15.2	0.721675	972.2	16.1	-0.811844
						1571	16.3938	-0.169501								-61	15.2	0.721675	968.7	16.6	-0.127919
						1567	16.918	0.494519											965.1	16.5	-0.264704
						1563	16.5063	-0.0269278											961.6	16.6	-0.127919
						1559	16.4375	-0.114129											958	16.2	-0.675059
						1555	16.2174	-0.39284											947.3	16.8	0.145651
						1551	16.3213	-0.261253											936.6	15.9	-1.08541
						1547	16.3335	-0.245833											925.9	15.5	-1.63255
						1542.9	16.1884	-0.429643											915.2	16	-0.94863
						1538.9	16.9946	0.591566											904.5	16.2	-0.675059
						1534.9	17.0864	0.707802											893.8	16.2	-0.675059
						1530.8	17.5404	1.28284											883.1	16.3	-0.538274
						1526.7	17.0052	0.60497											872.4	16.1	-0.811844
						1522.6	16.151	-0.476974											861.7	16	-0.94863
						1518.5	17.8054	1.61844											851	16.1	-0.811844
						1514.4	17.3985	1.10309											840.3	16.6	-0.127919
						1510.3	16.882	0.448843											829.6	15.9	-1.08541
						1506.2	17.2109	0.86549											818.9	16.6	-0.127919
						1502	16.6224	0.120074											808.1	16.2	-0.675059
						1497.9	15.1599	-1.73226											797.4	16.2	-0.675059
						1493.7	16.1509	-0.477138											786.7	16.4	-0.401489
						1489.6	16.6713	0.182081											776	16.3	-0.538274
						1485.4	16.0618	-0.589971											765.3	16	-0.94863
						1481.2	16.3717	-0.197474											754.6	15.9	-1.08541
						1477	16.5588	0.0395136											743.9	15.5	-1.63255
						1472.8	16.2613	-0.337245											733.2	16.1	-0.811844
						1468.5	17.7232	1.51434											722.5	16.4	-0.401489
						1464.3	15.8539	-0.853306											711.8	16.5	-0.264704
						1460.1	16.9305	0.510299											701.1	16.4	-0.401489
						1455.8	16.0393	-0.618487											690.4	16	-0.94863
						1451.5	16.8431	0.399626											679.7	16.2	-0.675059
						1447.2	16.3861	-0.179223											669	16.2	-0.675059
						1438.6	17.5406	1.28313											658.3	15.9	-1.08541
						1434.3	17.1777	0.823473											647.6	16.1	-0.811844
						1430	17.3968	1.10096											636.9	15.1	-2.17969
						1425.7	17.5973	1.3549											626.2	16.5	-0.264704
						1421.3	16.4875	-0.0507241											615.5	16	-0.94863
						1417	17.1597	0.800656											604.8	16.7	0.0088657
						1412.6	16.5481	0.0259827											594.1	16.3	-0.538274
						1408.2	17.9454	1.79575											583.4	16.6	-0.127919
						1403.8	17.3415	1.03096											572.7	16.1	-0.811844
						1399.4	17.6494	1.42094											562	16.2	-0.675059
						1395	17.5745	1.326											551.3	16.3	-0.538274
						1390.5	19.4072	3.64728											540.6	16.6	-0.127919
																			529.8	16.1	-0.811844
																			519.1	16.3	-0.538274
																			508.4	16.3	-0.538274
																			497.7	16.8	0.145651
																			487	16.2	-0.675059
																			476.3	16.5	-0.264704
																			465.6	15.9	-1.08541
																			454.9	16	-0.94863
																			444.2	15.9	-1.08541
																			433.5	16.2	-0.675059
																			422.8	16.4	-0.401489
																			412.1	15.4	-1.76934
																			401.4	15.1	-2.17969
																			390.7	16.3	-0.538274
																			380	16.2	-0.675059
																			369.3	16.2	-0.675059
																			358.6	16.5	-0.264704
																			347.9	16.5	-0.264704
																			337.2	15	-2.31648
																			326.5	15.8	-1.2222
																			315.8	16.4	-0.401489
																			305.1	16.3	-0.538274
																			294.4	16.7	0.0088657
																			283.7	15.8	-1.2222
																			273	16	-0.94863
																			262.2	15.7	-1.35898
																			251.5	16.9	0.282436
																			240.8	16.6	-0.127919
																			230.1	16.3	-0.538274
																			219.4	16.8	0.145651
																			208.7	17.2	0.692791
																			198	17.1	0.556006
																			187.3	17.8	1.5135
																			176.6	17.5	1.10315
																			165.9	17	0.419221
																			155.2	17.2	0.692791
																			144.5	16.1	-0.811844
																			131	15.7	-1.35898
																			117.6	16.2	-0.675059
																			104.1	16.9	0.282436
																			90.6	16.6	-0.127919
																			77.1	16.7	0.0088657
																			63.7	16.6	-0.127919
																			50.2	16.9	0.282436
																			36.7	16.8	0.145651
																			23.2	16.6	-0.127919
																			9.8	17	0.419221
