# Supplementary material for: Northern Hemisphere atmospheric pattern enhancing Eastern Mediterranean Transient-type events during the past 1000 years
Source: Copernicus journal article supplement (doi:10.5194/cp-17-1523-2021), 2021-07-20
Supplement: Supplementary file [file cp-17-1523-2021-supplement-title-page.pdf › cp-17-1523-2021-supplement-title-page.pdf]

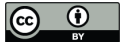

*Supplement of*

**Northern Hemisphere atmospheric pattern enhancing Eastern Mediterranean Transient-type events during the past 1000 years**

**Aleix Cortina-Guerra et al.**

*Correspondence to:* Aleix Cortina-Guerra (acortina@usal.es) and Joan O. Grimalt (joan.grimalt@idaea.csic.es)

- cp-17-1523-2021-supplement-title-page.pdf
- Sup\_material.xlsx
- \_\_MACOSX
  - .\_Sup\_material.xlsx

The copyright of individual parts of the supplement might differ from the article licence.
